# Supplementary material for: Efficiency of RAPD and SCoT Markers in the Genetic Diversity Assessment of the Common Bean
Source: MDPI journal article supplement (doi:10.3390/plants12152763), 2023-07-25
Supplement: s1 [file s1]

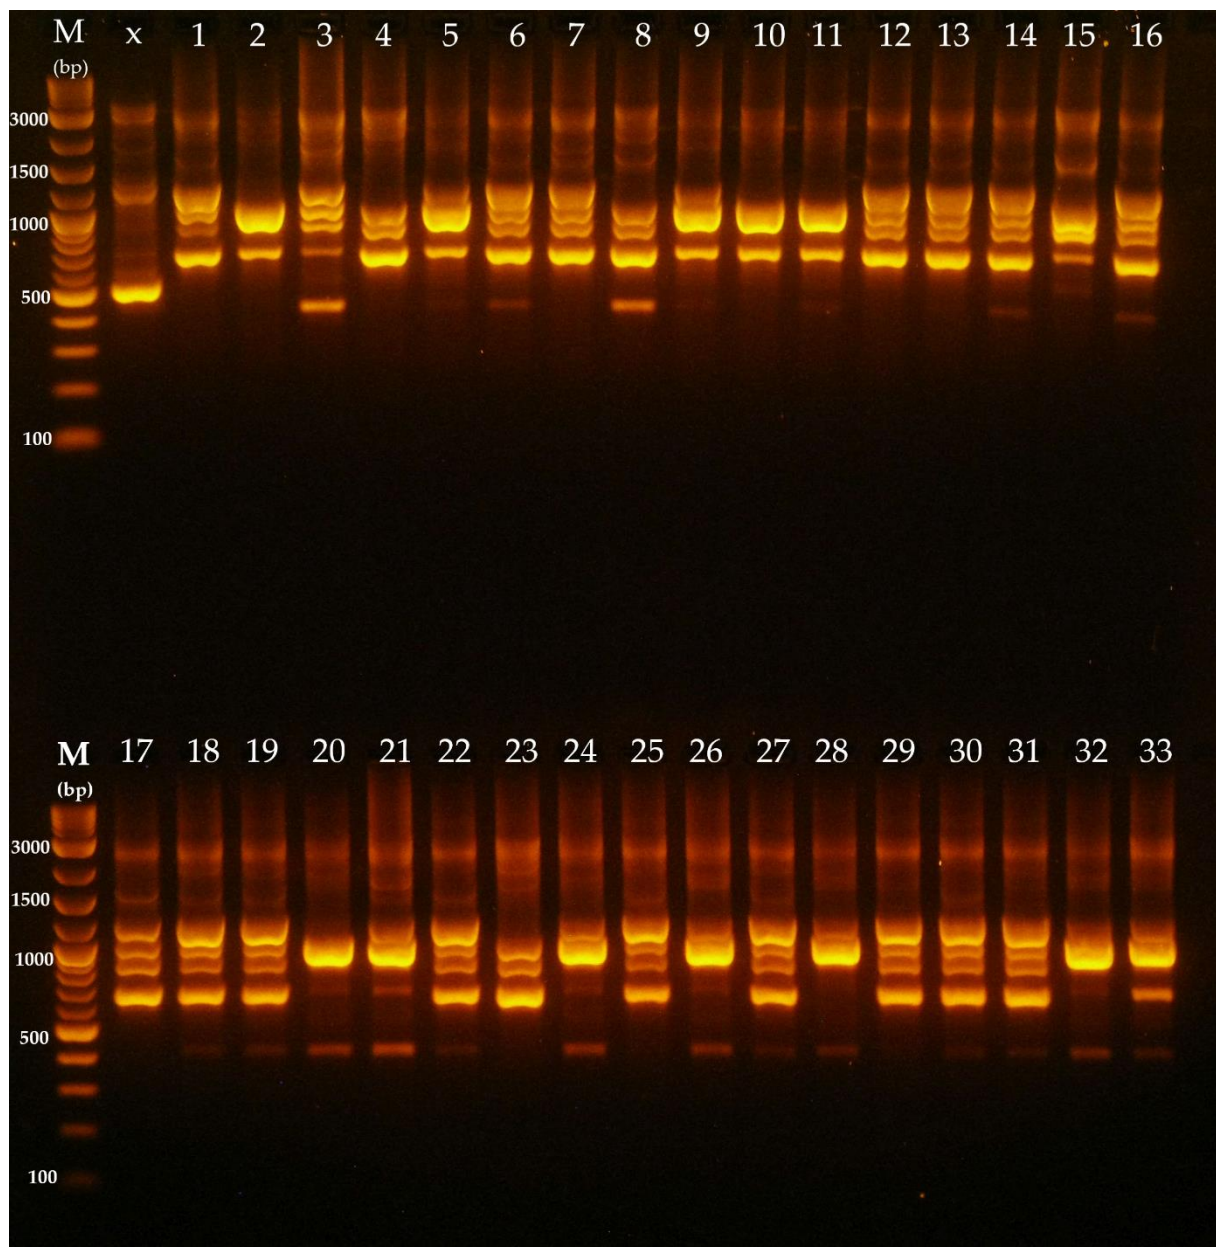

**Figure S1.** RAPD-PCR amplification products of the common bean genotypes generated by marker OPC-13.  
Notes: M - DNA ladder; x – sample is not included in the collection pf genotypes analysed in the work; 1-33 - common bean genotypes listed in Table 4 under the numbers 1-33.



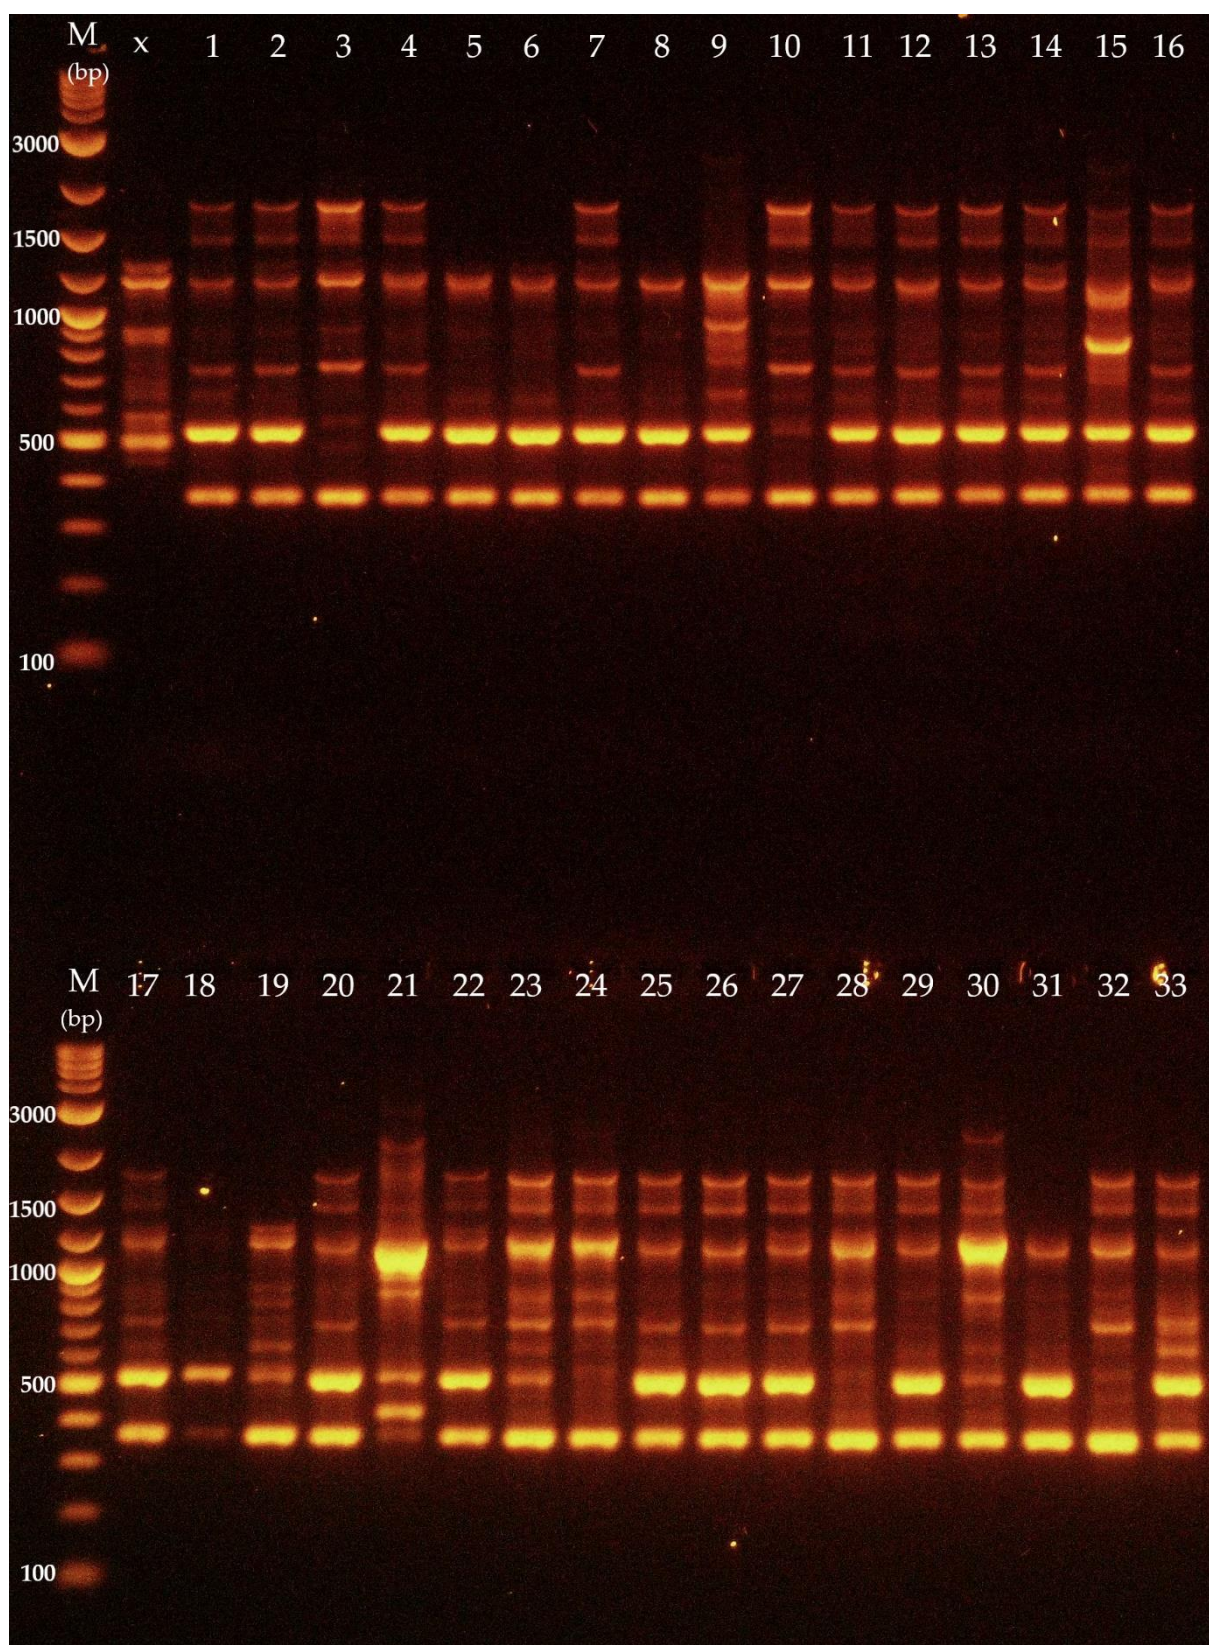

**Figure S2.** SCoT-PCR amplification products of common bean genotypes generated by marker SCoT54.  
 Notes: M - DNA ladder; x – sample is not included in the collection pf genotypes analysed in the work; 1-33 - common bean genotypes listed in Table 4 under the numbers 1-33.
